# Supplementary material
Source: publisher figshare collection journal article supplement (https://gsapubs.figshare.com/articles/dataset/_/13125335)
Supplement: Supplementary file 1 [file 1]

## 1 SUPPLEMENTARY INFORMATION

### 2 **Geological setting**

3 The Yap trench is located along the SE convergent boundary of the Philippine Sea plate in the  
4 W-Pacific (Fig. DR2A) and constitutes part of the Izu–Bonin–Mariana–Yap–Palau trench-arc  
5 system. The trench is ~700 km long and forms a convex shape towards the SE. It reaches a  
6 maximum depth of 8946 m at 10°29.957' N, 138°40.987' E (Fujiwara et al., 2000). The  
7 outcrops of the serpentinites are located on the inner trench slope of the overriding plate of the  
8 Yap Trench (Fig. DR2B). The rock sample was recovered by the Human Occupied Vehicle  
9 (HOV) *Jiaolong* during Dive 150 (the 38<sup>th</sup> China scientific survey cruise in 2017, RV  
10 Xiangyanghong 09) at 6413 meters below sea-level.

### 11 **Sample preparation**

12 The serpentinite was exposed on the seafloor and collected by the robot arm of the Human  
13 Occupied Vehicle *Jiaolong*. The sample was refrigerated instantly after being recovered and  
14 was then transferred into a -80 °C refrigerator. To limit any laboratory contamination,  
15 centimeter-sized samples were extracted from the internal regions of the original serpentinite  
16 by sawing with sterile, ultrapure water. Prior to cutting, the saw was treated with 5% sodium  
17 hypochlorite and then rinsed with sterile, ultrapure water. A thin section was prepared for  
18 optical petrographic observations. A part of the remaining sample was subsequently thinned  
19 into a resin-free round chip (diameter, 10 mm; thickness, 3 mm) using a stainless steel  
20 polishing disc and concentrated ethanol as well as ultrapure water.

21 Additionally, a broken rock fragment with an unexposed, fresh surface was prepared.  
22 Also, the rock chip was subjected to a three-step polishing procedure (I, II, III; Table DR1),  
23 followed by electron microscopic observations (Fig. DR7). As a blank, an organic-free sample  
24 was also prepared and treated in the same way as all other samples. Ultrapure water and

25 ultrasonic bath were used to clean the sample before observations. Focused ion-beam  
 26 (FIB)-foils were prepared in regions of interest after step II.

**Table DR1:** Polishing procedure of the round rock chip and blank sample.

| Step | Polishing method                                                                                 | Analyses                    |
|------|--------------------------------------------------------------------------------------------------|-----------------------------|
| I    | Polished with concentrated ethanol, ultrapure water and aluminum oxide on a clean polishing film | SEM (Pt coating)            |
| II   | Polished with concentrated ethanol, ultrapure water and aluminum oxide on a clean polishing film | FIB-SEM (Pt coating)<br>TEM |
| III  | Ar ion-beam polishing                                                                            | SEM (Pt coating)            |

27

28 SEM and Raman analyses reveal the presence of organic matter in the round chip after each  
 29 polishing step as well as in the broken rock fragments (Figs. DR 7A, B), whereas no carbon  
 30 was detected in the polished blank sample. These observations imply that the organic matter  
 31 was not introduced during the polishing procedure and is part of the original sample collected  
 32 at the seafloor.

33 We also prepared a FIB-foil of an area with the serpentinite that does not contain any  
 34 organics as a reference sample. Energy-dispersive X-ray (EDX)-scanning transmission  
 35 electron microscopy (STEM) mapping of this reference sample did not detect any carbon. This  
 36 demonstrates that carbon-contamination due to insufficient decomposition of the  
 37 Pt-metal-organic precursor (i.e.,  $C_5H_4CH_3Pt(CH_3)_3$ ), during FIB-scanning electron microscopy  
 38 (SEM) sample preparation, does not produce detectable organic signatures in the samples.

### 39 **Estimation of CO<sub>2</sub> required to generate CCM**

40 Assuming individual CCM has the same distribution and chemical composition, the equation  
 41 of required CO<sub>2</sub> can be written as follows:

$$\rho = \frac{a\rho_0 M}{M_0}$$

where  $\rho$  is the density of CO<sub>2</sub>,  $\rho_0$  is the density of CCM (1200 kg/m<sup>3</sup>, immature kerogen; Okiongbo et al., 2005),  $a$  is the proportion of CCM in serpentinite,  $M$  and  $M_0$  are molecular mass of CO<sub>2</sub> (44 g/mol) and CCM (12 g/mol) respectively. The partially altered peridotite has up to ~4 vol.% porosity with 99.7 vol.% pores size < 100 nm (Tutolo et al., 2016). According to TEM observations, ~70 vol.% individual pore is filled with CCM, and 10% of the nanoporosity is assumed to be catalytically active. We therefore estimated that there are 0.28 vol.% CCM in serpentinite, which can eventually sequester 12.3 kg/m<sup>3</sup> (280 mol/ m<sup>3</sup>) CO<sub>2</sub>.

## Methods

All analyses were conducted at Utrecht University, the Netherlands.

### Scanning electron microscopy

Overview SEM imaging was carried out on Pt-coated specimens, using a JEOL JCM-6000 in backscattered electron (BSE) mode. Standard operating conditions for SEM imaging was 15 kV accelerating voltage at a working distance of 20 mm.

### Focused ion-beam-scanning electron microscopy & transmission electron microscopy

FIB-SEM investigations were carried out on Pt-coated specimens in secondary electron and backscattered electron modes under high vacuum, using a FEI Helios Nanolab G3. Analytical conditions were 2-15 kV accelerating voltage, low current (0.1 nA) and a 4 mm working distance. Energy-dispersive X-ray (EDX) spectroscopy analyses were carried out with an Oxford INCA-350 spectrometer. The FIB-SEM was also used to prepare electron-transparent thin foils (final thickness <100 nm). These foils were subsequently analyzed using a FEI Talos F200X TEM operated at 200 kV. Bright-field (BF), dark-field (DF) and high-angle annular dark-field (HAADF) images were collected simultaneously. High-sensitivity two-dimensional EDX chemical mapping was executed using the FEI Super-EDX setup. Continuous monitoring

65 of HAADF images generated during EDX-STEM mapping allowed us to minimize the  
66 electron beam-induced damage of the carbonaceous matter. All processing and peak  
67 deconvolution was done in the Bruker ESPRIT 1.9 software package.

#### 68 **Raman spectroscopy**

69 Raman spectra were obtained with a WiTec alpha 300R Raman microscope using the 532 nm  
70 wavelength laser operating at a power less than 1mW, to avoid graphitization of the complex  
71 carbonaceous material, with integration times of 10 s. Raman spectra were collected using a  
72 50× objective. Each selected spectrum was fitted using the Fast Fourier transform method after  
73 being backgrounds subtracted to a polynomial function. Assignment of molecular vibrations is  
74 based on published data (Socrates, 2001; Goto et al., 2016).

#### 75 **Photo-induced force microscopy**

76 Photo-induced force Microscopy (PiFM) experiments were performed using a VistaScope  
77 microscope (Molecular Vista, Inc.). AFM micrographs of varying sizes (0.5-50  $\mu\text{m}$ ), but set  
78 resolution (256 x 256 pixels), were measured in dynamic non-contact mode using NCHAu tips  
79 (Nanosensors). Infrared data was collected using a Block Engineering tunable quantum  
80 cascade laser (QCL) as mid-IR source providing an IR working range of 775-1970  $\text{cm}^{-1}$ .

81 After acquiring topography information, IR information was collected in three forms: 1) single  
82 point IR spectra, 2) IR images at set wavenumbers, and 3) hyperspectral (hyPIR) images with a  
83 full IR spectrum measured at each pixel. The single point IR spectra were taken with an  
84 acquisition time of 500 ms, a resolution of 4  $\text{cm}^{-1}$ , and were averaged (up to 40 times). These  
85 near-field infrared measurements were performed with an approximate lateral resolution of 10  
86 nm and a probing depth of 30 nm (Fu et al., 2017). The IR images were taken after identifying  
87 relevant IR wavenumbers from the point spectra. They were taken simultaneously with  
88 topography images by tuning detection of the topography signal to the second-, and IR signal to  
89 the first Eigenmode of the AFM cantilever. HyPIR images were typically taken at lower

resolution (128 x 128 pixels) to decrease measurement time. Spectrum acquisition time varied between 300-600 ms, and the scanning speed was adjusted accordingly.

The PiFM data (AFM micrographs, point spectra, IR images) was processed using SurfaceWorks software (Molecular Vista, Inc.). The hyPIR image datasets were analyzed using Principle Component Analysis (PCA) function provided in the TXM-XANES-Wizard software package (Liu et al., 2012). Prior to PCA analysis, the hyPIR images were normalized by dividing them by their sum image and multiplied in order to have spectral intensities larger than 1 (a.u.). Subsequently, the image stacks were cropped, and the data was mean-centered. A number of Principle Components (typically 3-4) were chosen after inspection of their scree plot and Eigenspectra for k-means clustering. For the clustering, the number of clusters was (at least) twice the number of PCs, and k-means replicates was set to 10. Subsequently, EM for GMM clustering was applied. The resulting clusters and their spectra were inspected for information. Clusters would be merged or removed if they showed superfluous information. The result would be an image with the lowest amount of clusters which could still accurately describe all spectral features.

Differences in Raman and PiFM spectra could be due to either natural variations or differences between bulk vibrational spectroscopy, i.e., Raman spectroscopy, and true surface-mode spectroscopy, i.e., PiFM. Raman spectroscopic analyses of micron-sized CCM across the serpentine fragments.

### Supplemental Acknowledgements

We thank Dr. Lingmin Zhang (Tongji University) for assistance with EMP analyses, Tilly Bouten (Utrecht University) for assistance with SEM analyses and Kaibo Nan (Shanghai University) for assistance with porosity distribution calculations.

### References of Data Repository

- 114 Chen, W., Zheng, H., Teng, H., Wang, Y., Zhang, Y., Zhao, C. and Liao, Y., 2015,  
 115 Enhanced Coagulation-Flocculation Performance of Iron-Based Coagulants:  
 116 Effects of  $\text{PO}_4^{3-}$  and  $\text{SiO}_3^{2-}$  Modifiers: PloS one, v. 10.
- 117 Doidjo, M.T., Belec, L., Aragon, E., Joliff, Y., Lanarde, L., Meyer, M., Bonnaudet, M. and  
 118 Perrin, F.X., 2013, Influence of silane-based treatment on adherence and wet  
 119 durability of fusion bonded epoxy/steel joints: Progress in Organic Coatings, v. 76,  
 120 p. 1765–1772.
- 121 Fu, D., Park, K., Delen, G., Attila, Ö., Meirer, F., Nowak, D., Park, S., Schmidt, J.E. and  
 122 Weckhuysen, B.M., 2017, Nanoscale infrared imaging of zeolites using  
 123 photo-induced force microscopy: Chemical Communications, v. 53, p. 13012–  
 124 13014.
- 125 Fujiwara, T., Tamura, C., Nishizawa, A., Fujioka, K., Kobayashi, K. and Iwabuchi, Y.,  
 126 2000, Morphology and tectonics of the Yap Trench. Marine Geophysical  
 127 Researches, v. 21, p. 69–86.
- 128 Goto, Y., Shimizu, K.I., Kon, K., Toyao, T., Murayama, T. and Ueda, W., 2016,  
 129  $\text{NH}_3$ -efficient ammoxidation of toluene by hydrothermally synthesized layered  
 130 tungsten-vanadium complex metal oxides: Journal of catalysis, v. 344, p. 346–353.
- 131 Haberhauer, G. and Gerzabek, M.H., 1999, Drift and transmission FT-IR spectroscopy of  
 132 forest soils: an approach to determine decomposition processes of forest litter,  
 133 Vibrational Spectroscopy: v. 19, p. 413–417.
- 134 Kelemen, P.B., Matter, J., Streit, E.E., Rudge, J.F., Curry, W.B. and Blusztajn, J., 2011,  
 135 Rates and mechanisms of mineral carbonation in peridotite: natural processes and  
 136 recipes for enhanced, in situ  $\text{CO}_2$  capture and storage: Annual Review of Earth and  
 137 Planetary Sciences, v. 39, p. 545–576.
- 138 Lafuente B., Downs R. T., Yang H., Stone N., 2015, The power of databases: the RRUFF

- 139 project, in: Highlights in Mineralogical Crystallography, Armbruster T. and Danisi  
140 R.M.: Berlin, Germany, W. De Gruyter, p. 1–30.
- 141 Li, L., Zhang, X., Luan, Z., Du, Z., Xi, S., Wang, B., Cao, L., Lian, C. and Yan, J., 2018, In  
142 situ quantitative Raman detection of dissolved carbon dioxide and sulfate in deep  
143 sea high-temperature hydrothermal vent fluids: Geochemistry, Geophysics,  
144 Geosystems, v. 19, p.1809–1823.
- 145 Liu, Y., Meirer, F., Williams, P. A., Wang, J., Andrews, J. C., and Pianetta, P., 2012,  
146 TXM-Wizard: a program for advanced data collection and evaluation in full-field  
147 transmission X-ray microscopy: Journal of synchrotron radiation, v. 19, p. 281–  
148 287.
- 149 Ménez, B., Pisapia, C., Andreani, M., Jamme, F., Vanbellinghen, Q.P., Brunelle, A.,  
150 Richard, L., Dumas, P. and Réfrégiers, M., 2018, Abiotic synthesis of amino acids  
151 in the recesses of the oceanic lithosphere: Nature, v. 564, p. 59–63.
- 152 Okiongbo, K.S., Aplin, A.C. and Larter, S.R., 2005, Changes in type II kerogen density as  
153 a function of maturity: Evidence from the Kimmeridge Clay Formation: Energy &  
154 fuels, v. 19, p. 2495–2499.
- 155 Reagan, M. K., et al., 2017, Geodynamic implications of crustal lithologies from the  
156 southeast Mariana forearc: Geosphere, v. 14, p. 1–22.
- 157
- 158
- 159
- 160
- 161
- 162
- 163





Rodriguez, J.A., Llobera, A. and Dominguez, C., 2000, Evolution of the mechanical stress on PECVD silicon oxide films under thermal processing: Journal of materials science letters, v. 19, p. 1399–1401.

Socrates, G., ed., 2001, Infrared and Raman characteristic group frequencies: tables and charts: Chichester, U.K., John Wiley and Sons, 347 p.

Verma, S.P., 1986, Low levels of irradiation modify lipid domains in model membranes: a laser Raman study: Radiation research, v. 107, p. 183–193.

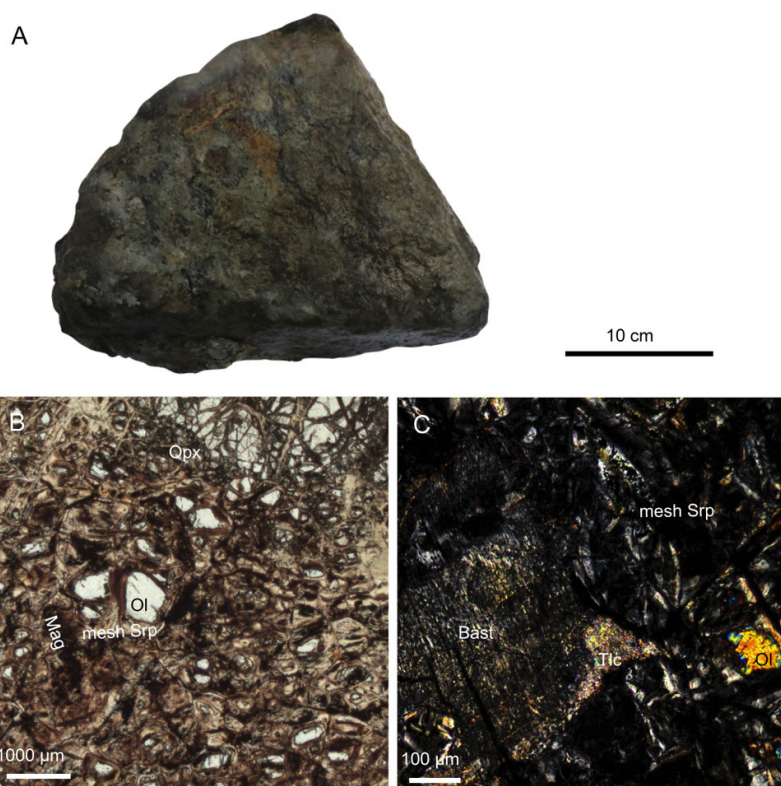

**Figure DR1. Optical images of the partly serpentinized harzburgite recovered by the Human Occupied Vehicle *Jiaolong* at the Yap Trench (6413 m below sea level). (A) Photograph of the dark-green hand specimen on board. (B-C) Cross-polars photomicrographs showing hydrated paragenesis, which is composed of mesh serpentine (mesh Srp) + magnetite**

178 (Mag), and bastite (Bast) + talc (Tlc), after olivine (Ol) and orthopyroxene (Opx; < 50 vol.%)  
 179 respectively.

**Table DR2.** Electron microprobe analyses (%wt) measured on mesh serpentine and relic olivine. Values are average and  $2\sigma$ .  $n$ , number of analyses; b. d. l., below detection limit;  $(\text{FeO})_{\text{T}}$ , total ferric and ferrous iron;  $X_{\text{Mg}} = \text{MgO} / (\text{MgO} + \text{FeO}_{\text{T}})$ .

| Mineral:                       | Olivine      | Mesh serpentine |
|--------------------------------|--------------|-----------------|
| $n$ :                          | 12           | 13              |
| wt. %                          |              |                 |
| SiO <sub>2</sub>               | 41.23 (0.39) | 40.21 (1.78)    |
| TiO <sub>2</sub>               | 0.01 (0.01)  | b. d. l.        |
| Al <sub>2</sub> O <sub>3</sub> | 0.02 (0.01)  | 0.30 (0.33)     |
| Cr <sub>2</sub> O <sub>3</sub> | 0.02 (0.01)  | 0.08 (0.07)     |
| (FeO) <sub>T</sub>             | 8.27 (0.14)  | 5.12 (1.29)     |
| MgO                            | 49.86 (0.88) | 36.79 (1.85)    |
| MnO                            | 0.11 (0.03)  | 0.04 (0.04)     |
| CaO                            | 0.06 (0.03)  | 0.08 (0.04)     |
| K <sub>2</sub> O               | b. d. l.     | 0.01 (0.01)     |
| Na <sub>2</sub> O              | b. d. l.     | 0.02 (0.02)     |
| Total                          | 99.67 (1.09) | 82.76 (1.35)    |
| $X_{\text{Mg}}$                | 0.86 (0)     | 0.88 (0.03)     |

180

181

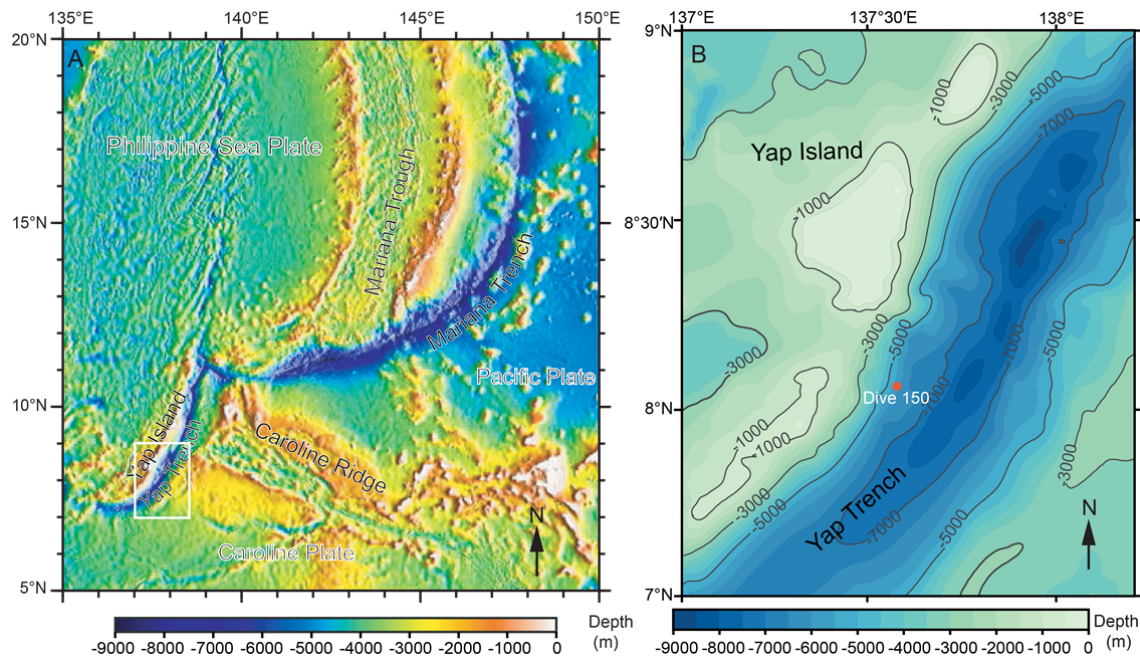

**Figure DR2. The Mariana-Yap subduction zone and location of the sampling site. (A)** Bathymetry map of the Yap and Mariana Trench (modified from Reagan et al., 2017). The maximum water depth of the Yap Trench reaches 8946 m. The white box depicts the studied area as shown in (B). **(B)** Dive 150 and sampling site (8.0514°N, 137.5949°E, 6413m; WGS84) executed by HOV *Jiaolong*.

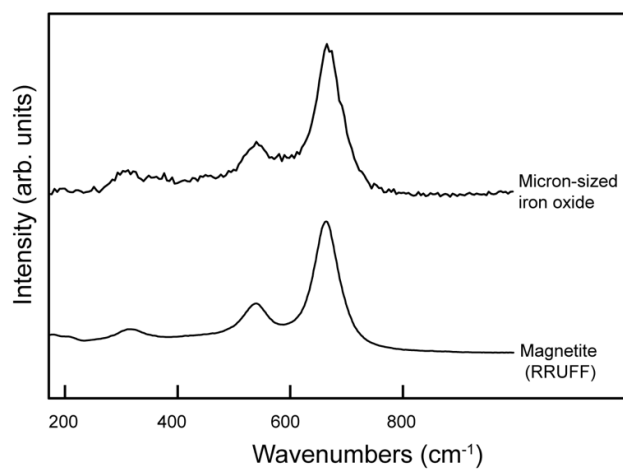

191

192 **Figure DR3.** Raman spectra of the micron-sized iron oxide grains shown in Fig. 1A of the  
193 main text are consistent with magnetite according to the RRUFF database (Lafuente et al.,  
194 2015).

195

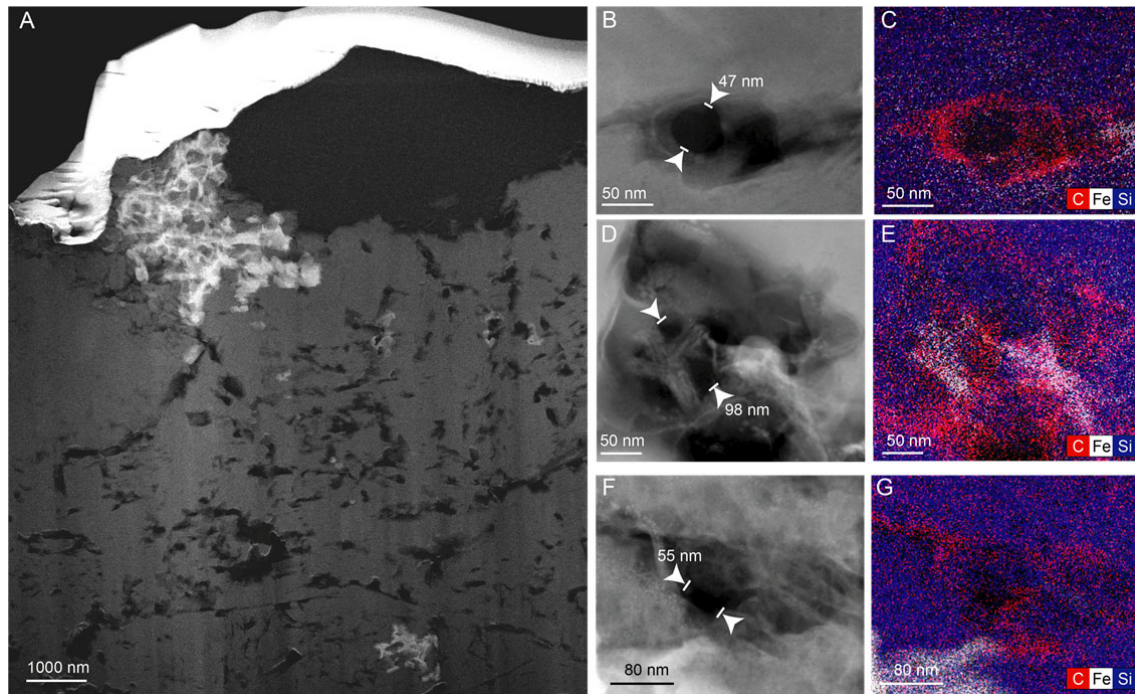

**Figure DR4. Nanopores and related COM within mesh serpentine.** (A) HAADF-STEM image of the FIB-foil showing nanopores below the micro-sized CCM. (B, D, F) High-resolution HAADF-STEM images of nanopores. (C, E, G) Corresponding elemental distributions for iron (white), carbon (red) and silicon (blue) in A. The association between carbon-rich material in the nanopore and the Fe-(hydr)oxide on the right of the image is clearly visible.

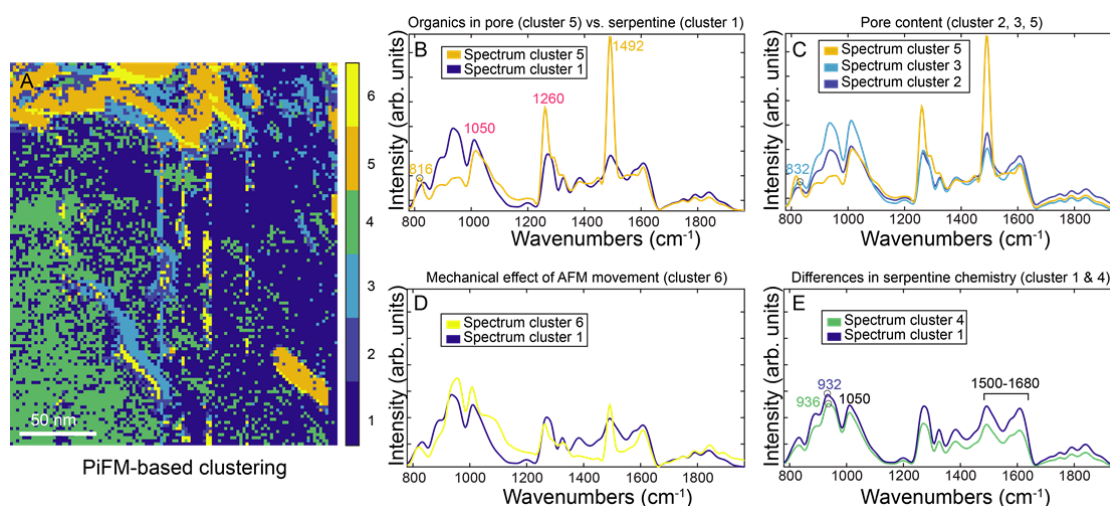

**Figure DR5. Results of the Principle Component Analysis (PCA, see Methods) of the PiFM hyperspectral maps.** (A) Cluster map from hyperspectral IR (hyPIR) image shown in Fig. 3 of the main text. (B-E) Comparison of the different spectra obtained from the PCA cluster analysis revealing the presence of aromatic compounds (cluster 5) and iron oxide (cluster 2) within serpentine nanopores. Differences in serpentine spectra (cluster 1 and 4) may have been caused by variation of Si-O-H bending modes. Cluster 6 in (D) shows the effect of AFM tip noise/dragging on spectrum acquirement.

**Table. DR3.** Assignment for the PiFM bands of nanosized CCM and related minerals within mesh serpentine (Fig. 3 and Fig. DR5). M represents cations in the hydrated silicate structure (e.g. Fe or Mg). Band assignments are based on refs. Ménez et al., 2018; Haberhauer and Gerzabek, 1999; Chen et al., 2015; Doidjo et al., 2013; Rodriguez et al., 2000.

| Wavenumber (cm <sup>-1</sup> ) | Assignment                              |
|--------------------------------|-----------------------------------------|
| 816                            | Aromatic C-H out-of-plane bending       |
| 832                            | Fe-O-Fe stretching                      |
| 932                            | Si-O-H bending                          |
| 936                            | Si-O-H bending                          |
| 1050                           | Si-O stretching & AFM tip contamination |
| 1260                           | AFM tip contamination                   |
| 1492                           | Aromatic C=C stretching                 |
| 1500-1680                      | M-O-H bending                           |



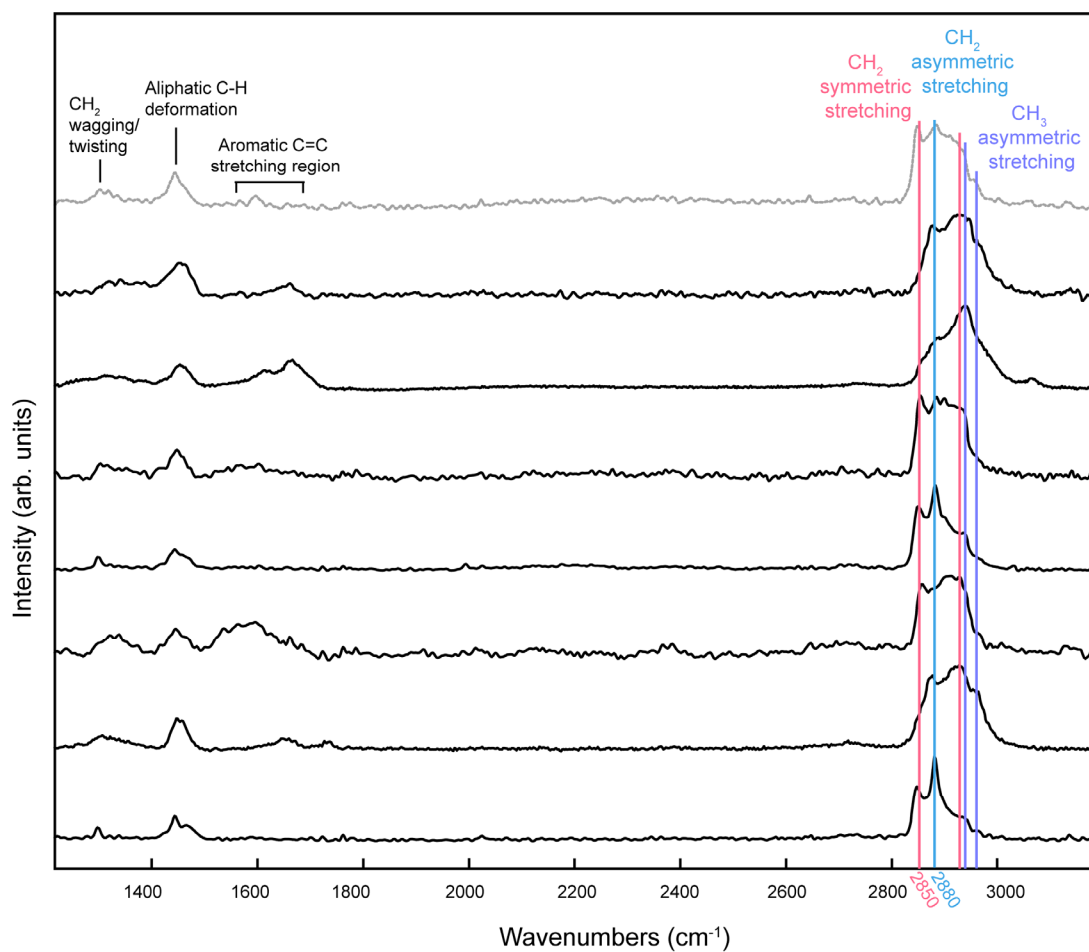

214

215 **Figure DR6.** Raman spectra of various micron-sized CCM within the investigated serpentinite  
 216 samples. These slightly different spectra corroborate the presence of aliphatic ± aromatic  
 217 compounds. The grey spectrum is equivalent to Fig. 3A shown in the main text.



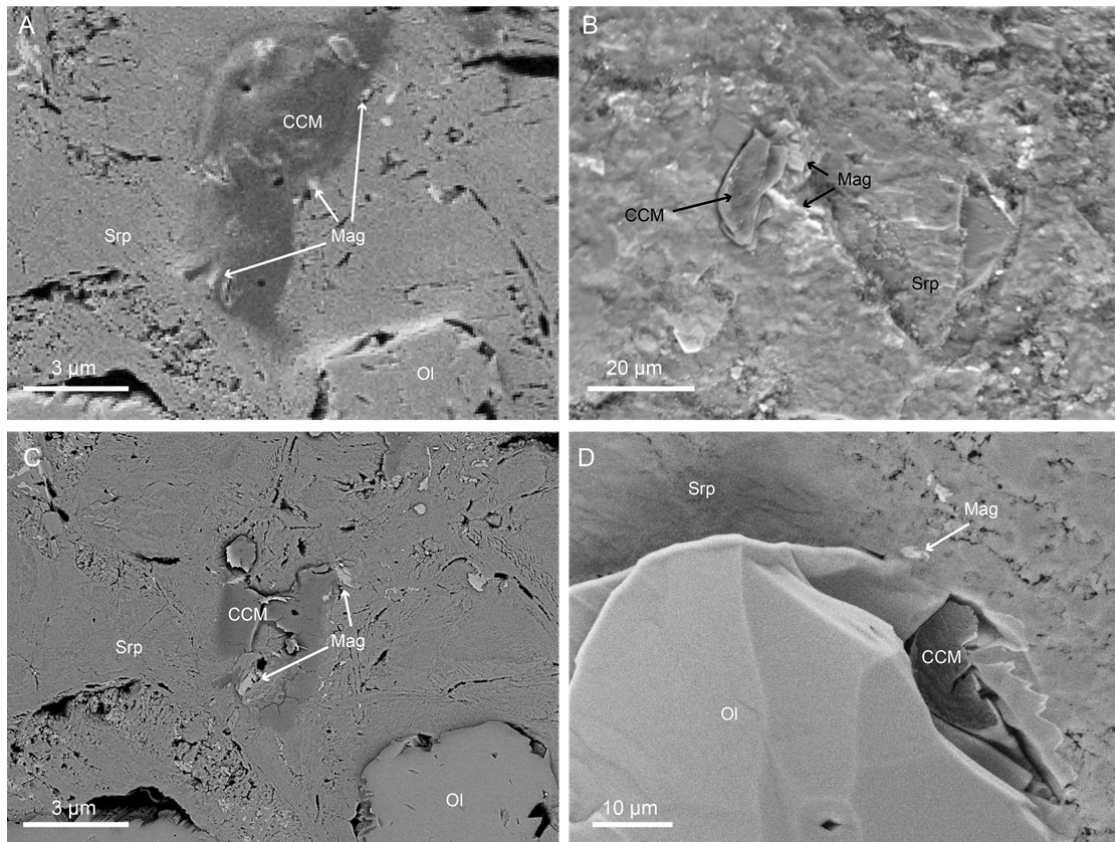

**Figure DR7. Backscattered electron (BSE) images showing the distribution of carbonaceous matter within serpentinites. (A) CCM associated with magnetite (Mag) after step I. (B) The presence of organic patch and magnetite in a freshly broken serpentinite sample. (C) Residual CCM associated with magnetite after step II (images in A and C are from the same location). (D) Organic patch filling void between serpentinite (Srp) and olivine (Ol) after step III.**

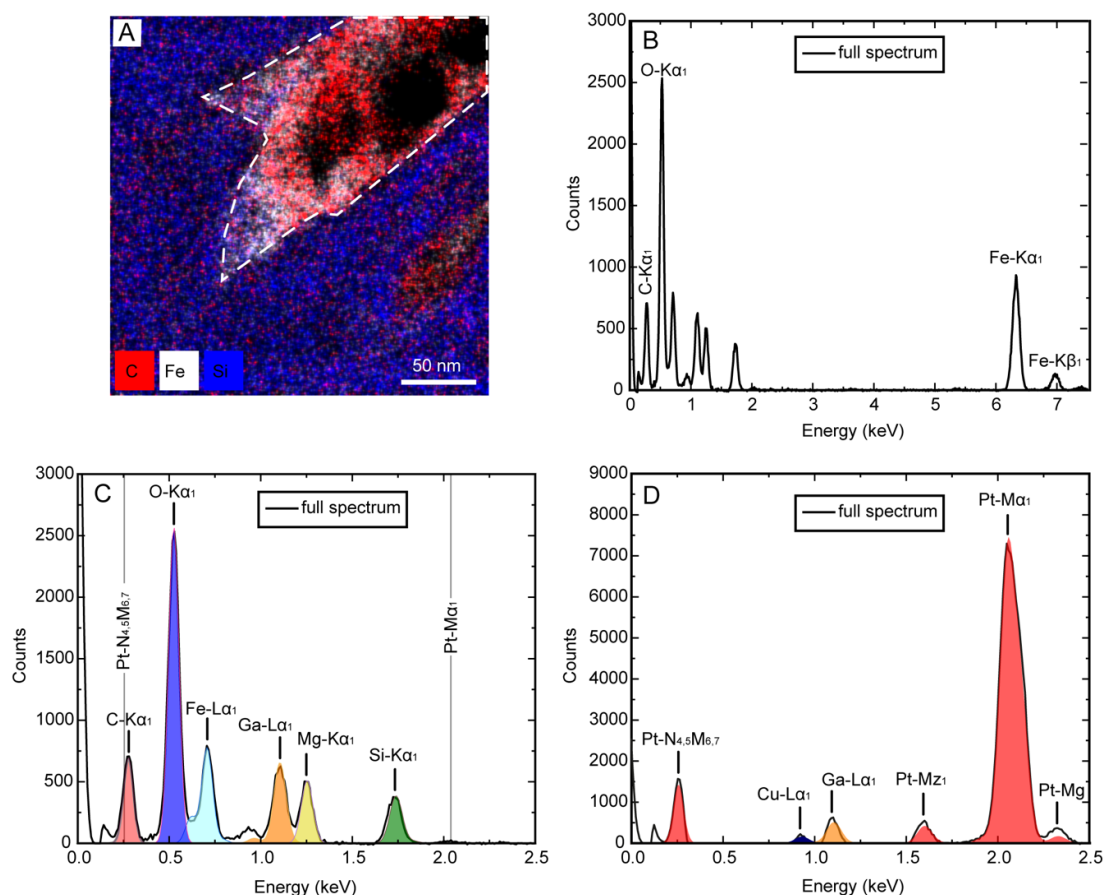

**Figure DR8. Energy-dispersive X-ray (EDX) mapping within a (scanning) transmission electron microscope of the serpentine nanopore.** (A) Equivalent EDX map as shown in Fig. 2F of the main article, where Si, Fe, and C denote serpentine, Fe-oxide and organic matter, respectively. (B) Full EDX spectrum of the area denoted by the dashed boarder in (A). (C) Magnified view of the spectrum shown in B at an energy range between 0 to 2.5 keV. Colored areas denoted fitted and deconvoluted spectra as executed in the Bruker ESPRIT 1.9 software package. We did not detect any Pt in the sample and the area of interest as highlighted by the lack of the Pt  $M\alpha_1$  line (position denoted by the through-going, grey line). For comparison, (D) shows the EDX signal from the Pt layer covering the FIB-SEM foil. This shows that the Pt metal organic precursor gas is completed decomposed during the deposition phase. Moreover, the C- $K\alpha_1$  peak originating for the organic matter in C is clearly distinguishable, and can be

237 deconvoluted, from any potential contribution of the  $\text{PtN}_{4,5}\text{M}_{6,7}$  line (grey through-going line).

238 A quantitative analysis of the EDX data can be found in Table DR4.

239

**Table DR4.** Quantification of EDX-STEM data shown in Figure DR8.

|       | Sample (area shown in Fig. DR8A) |           | Pt layer of FIB-SEM foil |           |
|-------|----------------------------------|-----------|--------------------------|-----------|
|       | wt. %                            | $2\sigma$ | wt. %                    | $2\sigma$ |
| C     | 26.3                             | 1.8       | 0                        | 0         |
| O     | 39.5                             | 2.5       |                          |           |
| Si    | 5.2                              | 0.1       |                          |           |
| Pt    | 0.0                              | 0.0       | 94.5                     | 19.0      |
| Mg    | 6.2                              | 0.5       |                          |           |
| Fe    | 17.5                             | 1.2       |                          |           |
| Ga    | 5.4                              | 0.5       | 5.5                      | 0.6       |
| Total | 100.0                            |           | 100.0                    |           |
| C/Fe  | 1.5                              |           |                          |           |

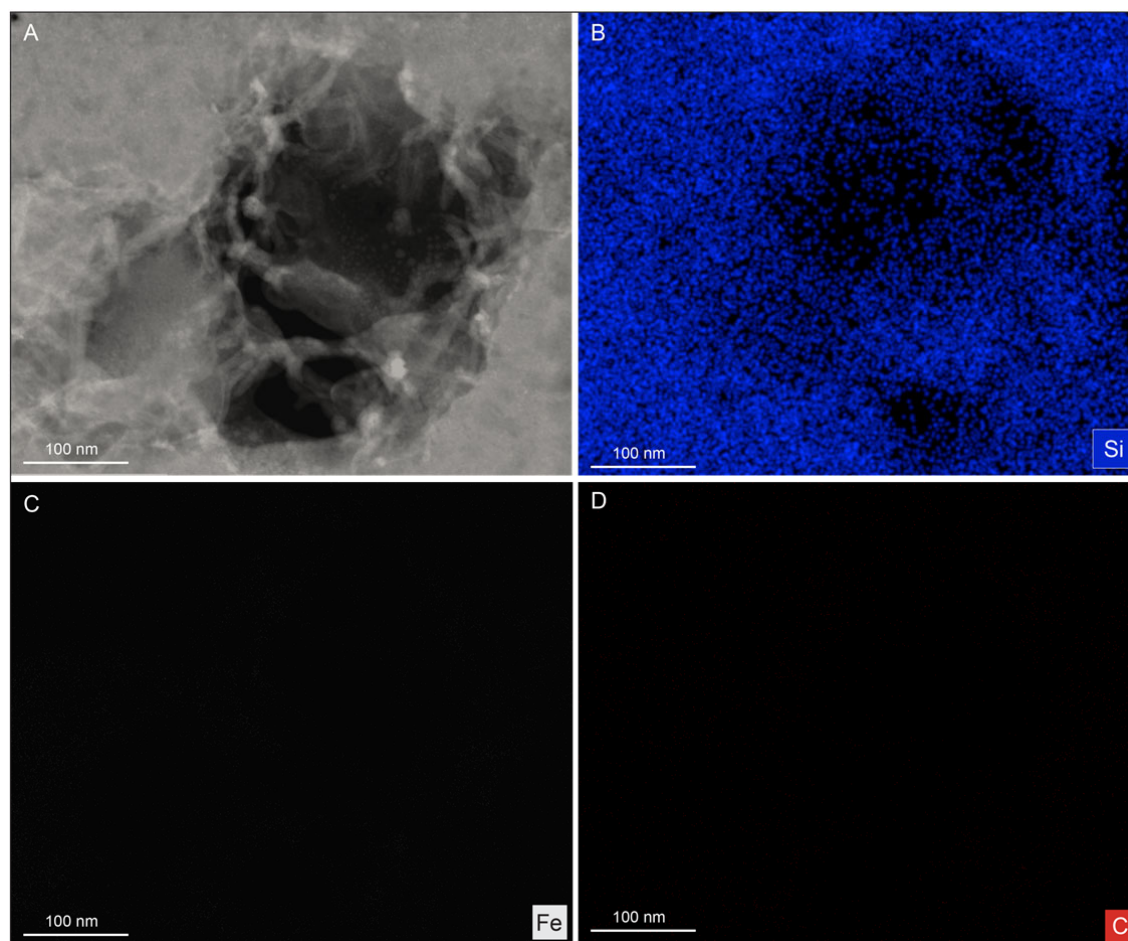

240

241 **Figure DR9. TEM image showing neither identifiable carbonaceous matter nor Fe-oxide**  
242 **grains are present around the nanopore of mesh serpentine. (A)** HAADF-STEM image of  
243 the nanopore. **(B, C, D)** are equivalent EDX maps in (A). Si, Fe, and C denote serpentine,  
244 Fe-oxide and carbonaceous matter, respectively.
